# Supplementary material for: Clearing the Air: Assessing the Effectiveness of Emission Policy in Qinhuangdao’s Key Industries
Source: MDPI journal article supplement (doi:10.3390/atmos14081218), 2023-07-28
Supplement: s1 [file s1]

# Supplementary Materials: Clearing the Air: Assessing the Effectiveness of Emission Policy in Qinhuangdao's Key Industries

Wanyue Shan <sup>1,2,†</sup>, Shaobo Chen <sup>1,2,†</sup>, Gang Wang <sup>3</sup>, Jianhui Li <sup>1,2</sup> and Xin Bo <sup>1,2,\*</sup>

## Section S1. Beijing-Tianjin-Hebei (BTH) Air Pollution Transmission Channel Cities

BTH air pollution transmission channel cities are also known as “2 + 26 cities”, which are located on the transport path of air pollutants from the BTH region. “2” refers to Beijing and Tianjin, while “26” refers to the 26 cities under the jurisdiction of the four provinces around Beijing and Tianjin. They are Shijiazhuang, Tangshan, Handan, Xingtai, Baoding, Cangzhou, Langfang, and Hengshui in Hebei Province; Taiyuan, Yangquan, Changzhi, and Jincheng in Shanxi Province; Jinan, Zibo, Jining, Dezhou, Liaocheng, Binzhou, and Heze in Shandong Province; Zhengzhou, Kaifeng, Anyang, Hebi, Xinxiang, Jiaozuo, and Puyang in Henan Province (including Xiong'an New Area, Xinji City and Dingzhou City in Hebei Province, Jiyuan City in Henan Province).

## Section S2. Emission Factors

### 1. Emissions Factors under the Baseline and BAU Scenario

The emission factors used in this study are derived from previous studies. The emission factors of this study primarily refer to the emission inventory guidelines for various pollution sources issued by the Ministry of Ecology and Environment [1–4] and the “Technical Manual for the Preparation of Urban Air Pollutant Emission Inventories” [5].

For SO<sub>2</sub>, PM, BC, and OC produced by coal burning, the material balance algorithm was used to calculate their emission factors in Equations (1)–(4):

$$EF_{SO_2} = 2 \times S \times (1 - sr) \quad (1)$$

$$EF_{PM} = Aar \times (1 - ar) \times f_{PM} \quad (2)$$

$$EF_{BC} = EF_{PM_{2.5}} \times f_{PM} \quad (3)$$

$$EF_{OC} = EF_{PM_{2.5}} \times f_{OC} \quad (4)$$

where  $S$  is the average base sulfur content received by coal burning;  $sr$  is the proportion of sulfur into bottom ash, %;  $Aar$  is the average base ash received from coal burning;  $ar$  is the proportion of ash entering the bottom ash, %;  $f_{PM}$  refers to the proportion of particulate matter in a certain particle size range (PM<sub>2.5</sub> and PM<sub>10</sub>) in the total particulate matter generated by emission sources;  $f_{BC}$  is the proportion of BC to PM<sub>2.5</sub>;  $f_{OC}$  is the proportion of OC to PM<sub>2.5</sub>.

For other air pollutants, the emission factors referred to the “Technical Manual for the Preparation of Urban Air Pollutant Emission Inventories” [5]. For the aviation source in Qinhuangdao, the emission factors of SO<sub>2</sub> referred to previous research of our team [6].

### 2. The Ultra-Low Emission Factors of PM<sub>10</sub>, SO<sub>2</sub>, and NO<sub>x</sub>

For the iron and steel industry, the ultra-low emission factors for PM<sub>10</sub>, SO<sub>2</sub>, and NO<sub>x</sub> in Qinhuangdao were calculated by combining the concentration limits specified in the “Standards for Ultra-low Emission of Air Pollutants in the Iron and Steel Industry” (DB13/2169-2018) [7] issued by Hebei Province in 2018 and the theoretical flue gas volume (Tables S3–S6) [8,9]. For the cement and flat glass industries, the calculation method for

ultra-low emission factors was similar to that of the iron and steel industry. It involves using the concentration limits for PM<sub>10</sub>, SO<sub>2</sub>, and NO<sub>x</sub> specified in the “Standards for Ultra-low Emission of Air Pollutants in the Cement Industry” (DB 13/2167—2020) and the “Standards for Ultra-low Emission of Air Pollutants in the Flat Glass Industry” (DB 13/2168—2020) issued by Hebei Province in 2020 [10], combined with the benchmark emissions proposed by the Ministry of Ecology and Environment (Tables S7 and S8) [11,12]. These factors were then used to calculate the ultra-low emissions of PM<sub>10</sub>, SO<sub>2</sub>, and NO<sub>x</sub> in the cement and flat glass industries. The emission factors were calculated by Equation (5):

$$EF_{p,s} = C_{p,s} \times V_{p,s} \quad (5)$$

where  $C$  represents the ultra-low concentration limits emitted from three typical industries (mg/m<sup>3</sup>) and  $V$  represents the theoretical flue gas volume or the benchmark emissions (Nm<sup>3</sup>/t of product).

### Section S3. Calculation Formula

Emissions of pollutants were calculated using the emission factor method provided in Equation (6):

$$E = EF \times A \times (1 - \eta) \quad (6)$$

where  $E$  is the emission of each source,  $EF$  is the emission factor,  $A$  is the activity data, and  $\eta$  represents the removal efficiency of the control device.

#### 1. Fossil Fuel Combustion Sources

Fossil fuels have propelled the development of modern society. The sources include power plants, industrial combustion, and residential fuel combustion. Emissions from power plants were calculated using a bottom-up approach. Detailed unit-based data, including the geographical location, installed capacity, sulfur content, fuel consumption, electricity production, and emission control technologies of power plants in Qinhuangdao were gathered and checked to estimate emissions. The related calculation data were collected from the literature, reports, and city-level statistical yearbooks.

The emissions were calculated using the emission factor method as in Equation (7):

$$E_p = \sum_{i,j,k,l} A_{i,j,k} \times EF_{p,j,k} \times (1 - \eta_{p,j,k,l}) \quad (7)$$

where  $E$  represents the total emissions of pollutants;  $p, i, j, k, l$  represent the pollutant type, plant, source category, type of fuel, and emission control technology, respectively.  $A$  is the activity data;  $EF$  represents the assumed average emission factor;  $\eta$  is the removal efficiency.

#### 2. On-Road Mobile Sources

The emissions of on-road mobile sources were calculated using Equation (8):

$$E_p = \sum_i P_i \times VKT_i \times EF_{i,p} \quad (8)$$

where  $E$  is the total on-road mobile emissions, including SO<sub>2</sub>, NO<sub>x</sub>, CO, PM<sub>10</sub>, PM<sub>2.5</sub>, and VOCs;  $p$  and  $i$  represent the pollutant and vehicle type, respectively;  $P$  represents the annual total number of motor vehicles; VKT is the annual average vehicle-kilometers travelled; and  $EF$  is the emission factor.

#### 3. Non-Road Mobile Sources

Non-road mobile emissions originate from airplanes, ships, agricultural machinery, construction machinery, and agricultural transport vehicles. The non-road

mobile sources are characterized by a long residence time and high fuel consumption, and hence, require significant attention. Air pollutant emissions from non-road mobile sources were estimated using the top-down method. The pollutant calculation method is based on the “Technical Guidelines for the Preparation of Air Pollutant Emission Inventory from Non-road Mobile Sources (Trial)” [1]. SO<sub>2</sub> emissions were calculated with a mass balance method by Equation (9) and the emissions of other pollutants by airplanes were calculated according to Equation (10):

$$E_{SO_2,m} = 2 \times S_m \times Q_m \quad (9)$$

$$E_p = \sum LTO \times EF_p \times 10^{-3} \quad (10)$$

where  $p$  is the type of pollutant;  $m$  is the fuel type;  $S$  is the sulfur content;  $Q$  is the consumption;  $E$  is the total amount of  $p$ -type pollutants, t/a;  $LTO$  is the number of aircraft take-offs at Beidaihe Airport, LTO/a;  $EF$  is the pollutant emission factor of the aircraft, kg/LTO.

#### 4. Industrial Processes

Twenty sub-categories of industrial process sources were considered, such as the production of cement, tire, vegetable oil, coke, flat glass, synthetic fiber, synthetic ammonia, and iron and steel. It was difficult to acquire facility-level activity data from each factory due to the presence of numerous small factories that were scattered in Qinhuangdao. Emissions from industrial processes were estimated based on the quantum of annual production and emission factors of the unit product. Detailed information was obtained from government statistical data and field investigations including data on production technology, production type, yield, geographic location, and emission control devices.

#### 5. Solvent Use Source

Solvents were the main source of emission of VOCs and were classified as industrial and non-industrial sources. The solvent use source in Qinhuangdao City was calculated according to the combination of point sources and area sources. Among them, printing and dyeing, automobile spraying, furniture coating, and adhesive use were combined with statistical yearbook data, and other industries used statistical yearbook data or department survey data.

#### 6. Fugitive Dust

Fugitive dust sources primarily consisted of construction dust, road dust, yard dust, and soil dust. The content of road dust investigation primarily included the type, length, frequency of sprinkler, cleaning methods, and so on. The construction dust survey content primarily included the project name, latitude and longitude, construction type, floor area, construction area, construction stage, control measures, construction active month, and so on. The yard dust investigation content primarily included the yard name, latitude and longitude, material name, moisture content, cumulative loading and unloading, material loading and unloading times, stacking surface area, stacking height, control measures, etc. Soil dust survey content primarily included the soil type, area, bare degree, plant species, etc. The calculation method of emissions referred to the “Technical Guidelines for the Preparation of Dust Source Particulate Matter Emission Inventory (Trial)” issued by the Ministry of Ecology and Environment [2].

#### 7. Agricultural Sources

Agriculture was the main source of NH<sub>3</sub> emissions, including livestock, soil, nitrogen-fixing crops, nitrogen fertilizer application, and human discharge. Ammonia emissions from agricultural sources were estimated using activity data of each sub-category and specific emission factors. The crop-cultivated area provided activity data for soil

background and nitrogen-fixing plants, while the population value provided activity data for human discharge. Urea and several nitrogen fertilizers including ammonium bicarbonate, ammonium nitrate, ammonium sulfate, and other nitrogen fertilizers were considered for fertilizer application. In this study,  $\text{NH}_3$  emissions from five livestock types, including pigs, rabbits, goats, poultry, cows, and other cattle, were estimated. The activity data of each sub-category were gathered from the local government statistics and the Rural Statistical Yearbook.

## 8. Waste Treatment Sources

Waste treatment sources included solid waste treatment and sewage treatment. Solid waste treatment included solid waste landfill and solid waste incineration. The activity-level data primarily came from 2016 environmental statistics and Qinhuangdao Urban Management Bureau. There are 7 waste treatment enterprises and 16 sewage treatment plants in Qinhuangdao City. The specific formula was shown in Equation (6).

## 9. Biomass Burning

The emissions from biomass burning were calculated using Equation (11):

$$E_{i,j} = \sum_{i,j} P_i \times C_i \times D_i \times B_i \times F_i \times EF_{i,j} \quad (11)$$

where  $E$  is the total emissions of pollutants, including  $\text{SO}_2$ ,  $\text{NO}_x$ ,  $\text{CO}$ ,  $\text{PM}_{10}$ ,  $\text{PM}_{2.5}$ , VOCs, and  $\text{NH}_3$ ;  $i$ , and  $j$  represent the crop and pollutant type, respectively;  $P$  is the annual crop production;  $C$  is the grain-to-straw ratio of different crops;  $D$  is the dry matter content of different crops;  $B$  is the straw burning rates for different crops; and  $F$  is the consumption efficiency for various crops.

## 10. Storage and Transportation

The storage and transportation sources referred to the emission source of volatile organic compounds caused by the leakage of crude oil, gasoline, diesel oil, and natural gas during storage, transportation, and handling. Storage and transportation sources were processed according to point sources, and VOCs of oil storage, oil transportation, and gas stations are estimated. The specific formula is shown in Equation (6).

## 11. Others

Other emission sources referred to the collection of air pollutant emission sources not covered by the above source classification, and currently only included cooking sources. According to the guidelines, the estimation of catering sources in Qinhuangdao included the emission of catering enterprises. The calculation formula is as follows:

$$E_i = \sum_i n \times V \times H \times \eta \times EF_i \times 10^{-9} \quad (12)$$

where  $E_i$  is the emission of pollutant  $i$ ;  $n$  is the number of furnace heads, number;  $V$  is the flue gas emission rate,  $\text{m}^3/\text{h}$ ;  $H$  is the total annual operating time, h;  $EF_i$  is the emission coefficient of pollutant  $i$ ,  $\text{mg}/\text{m}^3$ ;  $\eta$  is the flue gas removal efficiency of kitchen gas range hood.

## 12. The Ultra-Low Emissions

The emissions of  $\text{SO}_2$ ,  $\text{NO}_x$ , and  $\text{PM}_{10}$  under the ULE and PPC scenarios were calculated using the predicted activity data and the ultra-low emission factors calculated in Equation (5), as shown in Equation (13) [8]:

$$E_{p,s,y} = A_{s,y} \times EF_{p,s} \quad (13)$$

where  $p$  represents the emission pollutant species;  $s$  represents the emission sources;  $y$  represents the year;  $E$  represents the emissions of air pollutants from the production of different industries (kg);  $A$  is the activity data of the production (t); and  $EF$  is the emission factor that reflects the mass of emissions per emission source of production (kg/t).

#### Section S4. Spatial Allocation of the Emission Sources

The emission inventory was spatially allocated into 1 km × 1 km grid cells using the Geographic Information System (GIS) and relevant allocation surrogates to characterize the sources. For point sources with accurate location information, such as power plants and cement plants, emissions were allocated directly to the grid cells based on their latitude and longitude. Emissions from road mobile sources were treated as line sources, and road network traffic information based on road type was used as a surrogate to spatial emission allocation. The emissions from area sources related to land types, such as agricultural sources and non-road mobile sources, were spatially allocated by land use types. Emissions from residential burning and other sources were distributed mainly according to population density. Road network data, land use data were provided by Data Center for Resources and Environmental Sciences, Chinese Academy of Sciences (RESDC). Population data were extracted from the LandScan Global Population Data (1 km) in 2016. Detailed spatial surrogates for each emission source are listed in Table S2 of the Supplementary Material.

**Table S1.** Emission source categorization in Qinhuangdao City.

| Category               | Sub-Category                   | Fuel or Activity Types                                                                                |
|------------------------|--------------------------------|-------------------------------------------------------------------------------------------------------|
| Fossil fuel combustion | Power plants                   | Coal                                                                                                  |
|                        | Industrial boilers             | Coal, carbon, coke, natural gas, fuel oil, blast furnace gas                                          |
|                        | Residential combustion         | Liquefied petroleum gas (LPG), natural gas, coke, coal                                                |
| Industrial processes   | Iron and steel                 | Coke, pellet ore, sintering ore, pig iron, crude steel, steel billet                                  |
|                        | Casting                        | machine component, architectural parts, precision casting                                             |
|                        | Non-metallic minerals          | Cement, tile, lime, clinker, glass, artificial board                                                  |
|                        | Petrochemical (products)       | Crude oil processing and petroleum product manufacturing, Nitrogen fertilizer manufacturing           |
|                        | Papermaking and paper products | Corrugated paper, paper board                                                                         |
|                        | Other industries               | food manufacturing, tea, wine and beverages, rubber and plastics, furniture manufacturing             |
| Solvent use            | Pesticide use                  | The consumption of pesticide                                                                          |
|                        | Surface coating                | Construction painting, automotive spraying, and furniture coatings                                    |
|                        | Printing and dyeing            | Paint consumption of automobile spraying                                                              |
|                        | Other solvent use              | Asphalting paving, wood production, and adhesive use                                                  |
| Mobile sources         | On-road mobile                 | Buses, passenger cars, taxis, trucks, low-speed trucks, three-wheeled vehicles, motorcycles           |
|                        | Non-road mobile                | Agricultural machinery, airplanes, ships, construction machinery, and agricultural transport vehicles |

|                            |                                        |                                                            |
|----------------------------|----------------------------------------|------------------------------------------------------------|
| Fugitive dust              | Yard dust                              | Cement, timber processing, mining process, other crafts    |
|                            | Road dust                              | Road levels                                                |
|                            | Soil dust                              | Soil type                                                  |
|                            | Construction dust                      | Real estate construction, road construction                |
| Biomass burning            | Straw burning                          | Cooking, heating                                           |
| Agriculture sources        | Livestock                              | Pigs, cows, fowl other cattle                              |
|                            | Soil background                        | Area of field and fertilizer consumption                   |
|                            | Nitrogen fixing plants                 | peanut, soybean                                            |
|                            | Nitrogen fertilizer application        | Nitrogenous compound fertilizer                            |
| Storage and transportation | Human discharge                        | Number of people not using sanitary toilets in rural areas |
|                            | Oil and gas storage and transformation | Oil transportation, oil storage depots                     |
|                            | Gas station                            | Gasoline storage                                           |
| Waste disposal             | Sewage treatment                       | Sewage treatment volume                                    |
|                            | Waste treatment                        | Waste treatment volume                                     |
| Other sources              | Cooking                                | Annual operating time, flue gas emission rate              |

**Table S2.** Spatial distribution surrogates of each emission source.

| Source                     | Spatial Surrogates                                                             | Data Source                                                                       |
|----------------------------|--------------------------------------------------------------------------------|-----------------------------------------------------------------------------------|
| Fossil fuel combustion     | Longitude and latitude, population density                                     | Data Center for Resources and Environmental Sciences, Chinese Academy of Sciences |
| On-road mobile             | Road network                                                                   |                                                                                   |
| Non-road mobile            | Longitude and latitude of the airport, railway network, river, cultivated land |                                                                                   |
| Industrial processes       | Longitude and latitude                                                         |                                                                                   |
| Solvent use                | Longitude and latitude, cultivated land, population density                    |                                                                                   |
| Fugitive dust              | Cultivated land, longitude and latitude                                        |                                                                                   |
| Agriculture                | Cultivated land                                                                |                                                                                   |
| Storage and transportation | Longitude and latitude                                                         |                                                                                   |
| Waste disposal             | Longitude and latitude                                                         |                                                                                   |
| Others                     | Longitude and latitude                                                         |                                                                                   |

**Table S3.** Emission concentration and theoretical flue gas rate for sintering.

| Process   | Emission Source          | Level  | Scale Structure                       | Concentration (DB 2169-2018)<br>(mg/Nm <sup>3</sup> ) |                 |                  | Theoretical Flue Gas Rate (Nm <sup>3</sup> /t) |
|-----------|--------------------------|--------|---------------------------------------|-------------------------------------------------------|-----------------|------------------|------------------------------------------------|
|           |                          |        |                                       | SO <sub>2</sub>                                       | NO <sub>x</sub> | PM <sub>10</sub> |                                                |
| Sintering | Fuel crushing            | First  | ≥180 m <sup>2</sup>                   | 35                                                    | 50              | 10               | 74.5                                           |
|           |                          | Second | 90–180 m <sup>2</sup>                 | 35                                                    | 50              | 10               | 73.67                                          |
|           |                          | Third  | <90 m <sup>2</sup>                    | 35                                                    | 50              | 10               | 73.8                                           |
|           | Raw material preparation | First  | ≥180 m <sup>2</sup>                   | 35                                                    | 50              | 10               | 555                                            |
|           |                          | Second | 90–180 m <sup>2</sup>                 | 35                                                    | 50              | 10               | 557.67                                         |
|           |                          | Third  | <90 m <sup>2</sup>                    | 35                                                    | 50              | 10               | 639.6                                          |
|           | Head                     | First  | Desulfurization and Denitration (Dry) | 35                                                    | 50              | 10               | 1356.75                                        |
|           |                          | First  | Desulfurization and Denitration (Wet) | 35                                                    | 50              | 10               | 1510.5                                         |

|  |        |                                               |    |    |    |         |
|--|--------|-----------------------------------------------|----|----|----|---------|
|  | Second | Desulfurization and without Denitration (Dry) | 35 | 50 | 10 | 3053.8  |
|  | Second | Desulfurization and without Denitration (Wet) | 35 | 50 | 10 | 2743    |
|  | Third  | Without the desulfurization                   | 35 | 50 | 10 | 2743    |
|  | First  | ≥180 m <sup>2</sup>                           | 35 | 50 | 10 | 1329    |
|  | Second | 90–180 m <sup>2</sup>                         | 35 | 50 | 10 | 1330.63 |
|  | Third  | <90 m <sup>2</sup>                            | 35 | 50 | 10 | 1337.9  |
|  | First  | ≥180 m <sup>2</sup>                           | 35 | 50 | 10 | 439.2   |
|  | Second | 90–180 m <sup>2</sup>                         | 35 | 50 | 10 | 442.75  |
|  | Third  | <90 m <sup>2</sup>                            | 35 | 50 | 10 | 442.8   |

**Table S4.** Emission concentration and theoretical flue gas rate for pelletizing.

| Process     | Emission Source           | Level  | Scale Structure             | Concentration (DB 2169-2018) (mg/Nm <sup>3</sup> ) |                 |                  | Theoretical Flue Gas Rate (Nm <sup>3</sup> /t) |
|-------------|---------------------------|--------|-----------------------------|----------------------------------------------------|-----------------|------------------|------------------------------------------------|
|             |                           |        |                             | SO <sub>2</sub>                                    | NO <sub>x</sub> | PM <sub>10</sub> |                                                |
| Pelletizing | Firing                    | First  | Desulfurization (Dry)       | 35                                                 | 50              | 10               | 2750.75                                        |
|             |                           | First  | Desulfurization (Wet)       | 35                                                 | 50              | 10               | 3062.5                                         |
|             |                           | Second | Without the desulfurization | 35                                                 | 50              | 10               | 3301                                           |
|             | Size stabilization system | First  | ≥1,200,000 t/a              | 35                                                 | 50              | 10               | 1948                                           |
|             |                           | Second | 600,000–1,200,000 t/a       | 35                                                 | 50              | 10               | 2020                                           |
|             |                           | Third  | <600,000 t/a                | 35                                                 | 50              | 10               | 1947.88                                        |
|             | Raw material preparation  | First  | ≥12,00,000 t/a              | 35                                                 | 50              | 10               | 10,883.33                                      |
|             |                           | Second | 600,000 t/a–1,200,000 t/a   | 35                                                 | 50              | 10               | 11,318.6                                       |
|             |                           | Third  | <600,000 t/a                | 35                                                 | 50              | 10               | 11,318.75                                      |

**Table S5.** Emission concentration and theoretical flue gas rate for blast furnace (BF).

| Processes | Emission Source       | Level  | Scale Structure         | Concentration (DB 2169-2018) (mg/Nm <sup>3</sup> ) |                 |                  | Theoretical Flue Gas Rate (Nm <sup>3</sup> /t) |
|-----------|-----------------------|--------|-------------------------|----------------------------------------------------|-----------------|------------------|------------------------------------------------|
|           |                       |        |                         | SO <sub>2</sub>                                    | NO <sub>x</sub> | PM <sub>10</sub> |                                                |
| BF        | Ore tank              | First  | ≥1200 m <sup>3</sup>    | 50                                                 | 150             | 10               | 3465                                           |
|           |                       | Second | 400–1200 m <sup>3</sup> | 50                                                 | 150             | 10               | 3457.2                                         |
|           |                       | Third  | <400 m <sup>3</sup>     | 50                                                 | 150             | 10               | 3444.6                                         |
|           | Hot stove             | First  | ≥1200 m <sup>3</sup>    | 50                                                 | 150             | 10               | 1267                                           |
|           |                       | Second | 400–1200 m <sup>3</sup> | 50                                                 | 150             | 10               | 1571                                           |
|           |                       | Third  | <400 m <sup>3</sup>     | 50                                                 | 150             | 10               | 2001                                           |
|           | Blast furnace casting | First  | ≥1200 m <sup>3</sup>    | 50                                                 | 150             | 10               | 960                                            |
|           |                       | Second | 400–1200 m <sup>3</sup> | 50                                                 | 150             | 10               | 985.2                                          |
|           |                       | Third  | <400 m <sup>3</sup>     | 50                                                 | 150             | 10               | 1515.75                                        |

**Table S6.** Emission concentration and theoretical flue gas rate for basic oxygen furnace (BOF).

| Process | Emission Source        | Level  | Scale Structure | Concentration (DB 2169-2018)<br>(mg/Nm <sup>3</sup> ) |                 |                  | Theoretical Flue Gas Rate (Nm <sup>3</sup> /t) |
|---------|------------------------|--------|-----------------|-------------------------------------------------------|-----------------|------------------|------------------------------------------------|
|         |                        |        |                 | SO <sub>2</sub>                                       | NO <sub>x</sub> | PM <sub>10</sub> |                                                |
| BOF     | Hot metal pretreatment | First  | ≥100 t          | -                                                     | -               | 10               | 747                                            |
|         |                        | Second | 30–100 t        | -                                                     | -               | 10               | 723                                            |
|         |                        | Third  | <30 t           | -                                                     | -               | 10               | 746.8                                          |
|         | Primary off gas        | First  | ≥100 t          | 50                                                    | 150             | 50               | 633.6                                          |
|         |                        | Second | 30–100 t        | 50                                                    | 150             | 50               | 660.2                                          |
|         |                        | Third  | <30 t           | 50                                                    | 150             | 50               | 579.5                                          |
|         | Secondary off gas      | First  | ≥100 t          | 50                                                    | 150             | 10               | 1451                                           |
|         |                        | Second | 30–100 t        | 50                                                    | 150             | 10               | 1325.67                                        |
|         |                        | Third  | <30 t           | 50                                                    | 150             | 10               | 1812.6                                         |

**Table S7.** Emission concentration and theoretical flue gas rate for flat glass.

| Process  | Emission Source | Level  | Scale Structure | Concentration (DB 2168-2020) (mg/Nm <sup>3</sup> ) |                 |                  | Benchmark Displacement (Nm <sup>3</sup> /t) |
|----------|-----------------|--------|-----------------|----------------------------------------------------|-----------------|------------------|---------------------------------------------|
|          |                 |        |                 | SO <sub>2</sub>                                    | NO <sub>x</sub> | PM <sub>10</sub> |                                             |
| Floating | Melting         | First  | >900 t          | 50                                                 | 200             | 10               | 3200                                        |
|          |                 | Second | 600–900 t       | 50                                                 | 200             | 10               | 4080                                        |
|          |                 | Third  | 500–600 t       | 50                                                 | 200             | 10               | 4220                                        |
|          |                 |        | ≤500 t          | 50                                                 | 200             | 10               | 4410                                        |
| Rolling  | Melting         | -      | -               | 50                                                 | 200             | 10               | 4394                                        |

**Table S8.** Emission concentration and benchmark displacement for cement.

| Process              | Emission Source                   | Concentration (DB 2168-2020)<br>(mg/Nm <sup>3</sup> ) |                 |                  | Benchmark Displacement (Nm <sup>3</sup> /t) |
|----------------------|-----------------------------------|-------------------------------------------------------|-----------------|------------------|---------------------------------------------|
|                      |                                   | SO <sub>2</sub>                                       | NO <sub>x</sub> | PM <sub>10</sub> |                                             |
| Cement manufacturing | Cement kiln and clinker warehouse | 100                                                   | 30              | 100              | 5210.78                                     |

**Table S9.** The product output of the three industries in the past decade (unit: 10<sup>4</sup>t/a; for flat glass: 10<sup>4</sup> boxes/a, and 20 boxes of flat glass= 1 t flat glass).

| Output      | 2021      | 2020      | 2019      | 2018      | 2017      | 2016      | 2015      | 2014      | 2013      | 2012      |
|-------------|-----------|-----------|-----------|-----------|-----------|-----------|-----------|-----------|-----------|-----------|
| Pig-iron    | 20,202.98 | 22,903.76 | 21,774.37 | 21,396    | 17,997.27 | 18,398.37 | 17,382.3  | 16,941.95 | 17,027.6  | 16,358.54 |
| Crude steel | 22,496.45 | 24,976.95 | 24,157.7  | 23,723.37 | 19,121.47 | 19,259.97 | 18,832    | 18,530.3  | 18,849.6  | 18,048.4  |
| Steel       | 29,559.38 | 31,320.12 | 28,409.63 | 26,916.86 | 24,551.08 | 26,150.42 | 25,244.3  | 23,995.2  | 22,861.6  | 21,026.1  |
| Cement      | 11,354.63 | 11,859.97 | 10,527.39 | 9554.3    | 9125.5    | 9898.58   | 9126.17   | 10,721.46 | 12,747.38 | 13,131.84 |
| Flat glass  | 13,486.63 | 13,728.37 | 16,357.29 | 12,156.03 | 13,780.23 | 13,693.57 | 14,615.36 | 15,844.52 | 11,836.4  | 14,898.03 |

**Table S10.** The fluctuating range of the three industries in the past decade.

| Fluctuating Range | 2021  | 2020  | 2019  | 2018   | 2017  | 2016 | 2015  | 2014  | 2013   | 2012   |
|-------------------|-------|-------|-------|--------|-------|------|-------|-------|--------|--------|
| Pig-iron          | 9.8%  | 24.5% | 18.3% | 16.3%  | −2.2% | 0.0% | −5.5% | −7.9% | −7.5%  | −11.1% |
| Crude steel       | 16.8% | 29.7% | 25.4% | 23.2%  | −0.7% | 0.0% | −2.2% | −3.8% | −2.1%  | −6.3%  |
| Steel             | 13.0% | 19.8% | 8.6%  | 2.9%   | −6.1% | 0.0% | −3.5% | −8.2% | −12.6% | −19.6% |
| Cement            | 14.7% | 19.8% | 6.4%  | −3.5%  | −7.8% | 0.0% | −7.8% | 8.3%  | 28.8%  | 32.7%  |
| Flat glass        | −1.5% | 0.3%  | 19.5% | −11.2% | 0.6%  | 0.0% | 6.7%  | 15.7% | −13.6% | 8.8%   |



**Table S11.** The uncertainties of activity levels.

| Parameter                      | Distribution <sup>1</sup> | Parameter                       | Distribution     |
|--------------------------------|---------------------------|---------------------------------|------------------|
| Industrial fossil fuel use     | Normal (CV: 10%)          | Volatile raw materials use      | Normal (CV: 10%) |
| Industrial production          | Normal (CV: 10%)          | Material transportation         | Normal (CV: 10%) |
| Non-road fuel use              | Normal (CV: 20%)          | petrol sales volume             | Normal (CV: 10%) |
| Vehicle mileage travelled      | Normal (CV: 5%)           | petrol transport volume         | Normal (CV: 10%) |
| Livestock number               | Normal (CV: 10%)          | petrol storage                  | Normal (CV: 10%) |
| Pesticide application          | Normal (CV: 10%)          | Sewage treatment volume         | Normal (CV: 10%) |
| Agriculture production         | Normal (CV: 30%)          | Hazardous waste disposal volume | Normal (CV: 10%) |
| Industrial coating consumption | Normal (CV: 10%)          | Domestic waste disposal volume  | Normal (CV: 10%) |

<sup>1</sup> CV means Coefficient of Variation, and its value in Tables S11–S20 referred to the literature [13–15].

**Table S12.** The uncertainties of emission factors for SO<sub>2</sub>. 95% CIs are provided in the parentheses.

| Source                 | Sector                      | Distribution     |
|------------------------|-----------------------------|------------------|
| Fossil fuel combustion | Power plant                 | Normal (CV: 10%) |
|                        | Residential fuel combustion | Normal (CV: 10%) |
|                        | Industrial boilers          | Normal (CV: 10%) |
| Industrial process     |                             | Normal (CV: 20%) |
| On-road mobile         |                             | Normal (CV: 10%) |
| Non-road mobile source |                             | Normal (CV: 10%) |

**Table S13.** The uncertainties of emission factors for NO<sub>x</sub>. 95% CIs are provided in the parentheses.

| Source                 | Sector                             | Distribution     |
|------------------------|------------------------------------|------------------|
| Fossil fuel combustion | Power plant                        | Normal (CV: 5%)  |
|                        | Mining and Manufacturing industry  | Normal (CV: 10%) |
|                        | Residential combustion             | Normal (CV: 10%) |
|                        | Civil boilers                      | Normal (CV: 10%) |
|                        | Petrochemical (Industrial boilers) | Normal (CV: 10%) |
| On-road mobile         |                                    | Normal (CV: 20%) |
| Non-road mobile        |                                    | Normal (CV: 20%) |
| Process source         |                                    | Normal (CV: 20%) |

**Table S14.** The uncertainties of emission factors for CO. 95% CIs are provided in the parentheses.

| Source                 | Sector                             | Distribution     |
|------------------------|------------------------------------|------------------|
| Fossil fuel combustion | Power plant                        | Normal (CV: 5%)  |
|                        | Mining and Manufacturing industry  | Normal (CV: 10%) |
|                        | Residential combustion             | Normal (CV: 10%) |
|                        | Petrochemical (Industrial boilers) | Normal (CV: 10%) |
|                        | Civil boilers                      | Normal (CV: 10%) |
| On-road mobile         |                                    | Normal (CV: 20%) |
| Non-road mobile        |                                    | Normal (CV: 10%) |
| Process source         | Kiln exhaust gas                   | Normal (CV: 20%) |
|                        | Cement                             | Normal (CV: 20%) |

**Table S15.** The uncertainties of emission factors for PM<sub>2.5</sub>. 95% CIs are provided in the parentheses.

| Source                 | Sector                             | Distribution     |
|------------------------|------------------------------------|------------------|
| Fossil fuel combustion | Power plant                        | Normal (CV: 20%) |
|                        | Mining and Manufacturing industry  | Normal (CV: 10%) |
|                        | Petrochemical (Industrial boilers) | Normal (CV: 10%) |
|                        | Civil boilers                      | Normal (CV: 10%) |
|                        | Residential combustion             | Normal (CV: 10%) |
| On-road mobile         |                                    | Normal (CV: 20%) |
| Non-road mobile        | Agricultural machinery             | Normal (CV: 10%) |
| Process source         | Cement                             | Normal (CV: 20%) |
|                        | Kiln exhaust gas                   | Normal (CV: 20%) |
| Dust source            |                                    | Normal (CV: 20%) |

**Table S16.** The uncertainties of emission factors for PM<sub>10</sub>. 95% CIs are provided in the parentheses.

| Source                 | Sector                             | Distribution     |
|------------------------|------------------------------------|------------------|
| Fossil fuel combustion | Power plant                        | Normal (CV: 10%) |
|                        | Mining and Manufacturing industry  | Normal (CV: 20%) |
|                        | Petrochemical (Industrial boilers) | Normal (CV: 20%) |
|                        | Civil boilers                      | Normal (CV: 20%) |
|                        | Residential combustion             | Normal (CV: 20%) |
| On-road mobile         |                                    | Normal (CV: 20%) |
| Non-road mobile        | Agricultural machinery             | Normal (CV: 20%) |
| Process source         | Cement                             | Normal (CV: 20%) |
|                        | Kiln exhaust gas                   | Normal (CV: 20%) |
| Fugitive dust          |                                    | Normal (CV: 20%) |

**Table S17.** The uncertainties of emission factors for VOCs. 95% CIs are provided in the parentheses.

| Source                               | Sector                                               | Distribution     |
|--------------------------------------|------------------------------------------------------|------------------|
| Fossil fuel combustion               | Power plant                                          | Normal (CV: 10%) |
|                                      | Residential combustion                               | Normal (CV: 20%) |
|                                      | Mining and Manufacturing industry                    | Normal (CV: 20%) |
|                                      | Petrochemical (Industrial boilers)                   | Normal (CV: 20%) |
|                                      | Civil boilers                                        | Normal (CV: 20%) |
| On-road mobile                       |                                                      | Normal (CV: 20%) |
| Non-road mobile                      | Agricultural machinery                               | Normal (CV: 20%) |
| Process source                       | Cement                                               | Normal (CV: 10%) |
|                                      | Kiln exhaust gas                                     | Normal (CV: 20%) |
|                                      | Pesticide application                                | Normal (CV: 20%) |
| Solvent use                          | Industrial painting                                  | Normal (CV: 20%) |
|                                      | printing and dyeing                                  | Normal (CV: 20%) |
| Source of storage and transportation | Oil and gas emissions (oil depots)                   | Normal (CV: 20%) |
|                                      | Gas station                                          |                  |
|                                      | Oil and gas emissions (oil transportation companies) | Normal (CV: 20%) |
| Other                                | Hazardous waste disposal                             | Normal (CV: 20%) |
|                                      | Domestic waste disposal                              | Normal (CV: 20%) |

**Table S18.** The uncertainties of emission factors for NH<sub>3</sub>. 95% CIs are provided in the parentheses.

| Source                 | Sector                            | Distribution     |
|------------------------|-----------------------------------|------------------|
| Fossil fuel combustion | Power plant                       | Normal (CV: 20%) |
|                        | Mining and Manufacturing industry | Normal (CV: 10%) |
|                        | Civil boilers                     | Normal (CV: 10%) |
| Industrial possesses   | Cement                            | Normal (CV: 10%) |
|                        | Kiln exhaust gas                  | Normal (CV: 10%) |
| On-road mobile         |                                   | Normal (CV: 20%) |
| Waste treatment        | Sewage treatment                  | Normal (CV: 10%) |
|                        | Hazardous waste disposal          | Normal (CV: 10%) |
|                        | Domestic waste disposal           | Normal (CV: 10%) |
|                        | Livestock                         | Normal (CV: 10%) |
| Agriculture            | Soil background                   | Normal (CV: 10%) |
|                        | Nitrogen fixing crops             | Normal (CV: 10%) |
|                        | Nitrogen fertilizer application   | Normal (CV: 5%)  |
|                        | Human discharge                   | Normal (CV: 10%) |

**Table S19.** The uncertainties of emission factors for BC. 95% CIs are provided in the parentheses.

| Source                 | Sector                             | Distribution     |
|------------------------|------------------------------------|------------------|
| Fossil fuel combustion | Power plant                        | Normal (CV: 20%) |
|                        | Mining and Manufacturing industry  | Normal (CV: 10%) |
|                        | Petrochemical (Industrial boilers) | Normal (CV: 10%) |
|                        | Civil boilers                      | Normal (CV: 10%) |
|                        | Residential combustion             | Normal (CV: 10%) |
| On-road mobile         |                                    | Normal (CV: 20%) |
| Non-road mobile        | Agricultural machinery             | Normal (CV: 10%) |
| Process source         | Cement                             | Normal (CV: 20%) |
|                        | Kiln exhaust gas                   | Normal (CV: 20%) |

**Table S20.** The uncertainties of emission factors for OC. 95% CIs are provided in the parentheses.

| Source                 | Sector                             | Distribution     |
|------------------------|------------------------------------|------------------|
| Fossil fuel combustion | Power plant                        | Normal (CV: 20%) |
|                        | Mining and Manufacturing industry  | Normal (CV: 10%) |
|                        | Petrochemical (Industrial boilers) | Normal (CV: 10%) |
|                        | Civil boilers                      | Normal (CV: 10%) |
|                        | Residential combustion             | Normal (CV: 10%) |
| On-road mobile         |                                    | Normal (CV: 20%) |
| Non-road mobile        | Agricultural machinery             | Normal (CV: 10%) |
| Process source         | Cement                             | Normal (CV: 20%) |
|                        | Kiln exhaust gas                   | Normal (CV: 20%) |

**Table S21.** CALPUFF model parameter settings.

| Pattern | Parameter                          | Setting                  |
|---------|------------------------------------|--------------------------|
| Grid    | Lower-left coordinate              | (630,073 m, 4,359,925 m) |
|         | Number of grids in the X direction | 24                       |
|         | Number of grids in the Y direction | 30                       |
|         | Number of grids in the Y direction | 10                       |
|         | Grid spacing                       | 5 km                     |
|         | Base time zone                     | UTC + 08:00 Beijing      |
|         | Projection                         | UTM 50N                  |
|         | DATUM                              | WGS-84                   |

|         |                                                  |                                                                                          |
|---------|--------------------------------------------------|------------------------------------------------------------------------------------------|
| CALMET  | Run Option                                       | Use surface and overwater stations with 3D.DAT for upper air                             |
|         | Temperature and relative humidity                | Use 3D.DAT temperature at surface and upper levels                                       |
| CALPUFF | Chemical transformation                          | Computed internally (MESOPUFF II Scheme)                                                 |
|         | Species (Participate in chemical transformation) | SO <sub>2</sub> , NO <sub>x</sub> , SO <sub>4</sub> , NO <sub>3</sub> , HNO <sub>3</sub> |
|         | Receptor                                         | The monitoring station in Qinhuangdao                                                    |

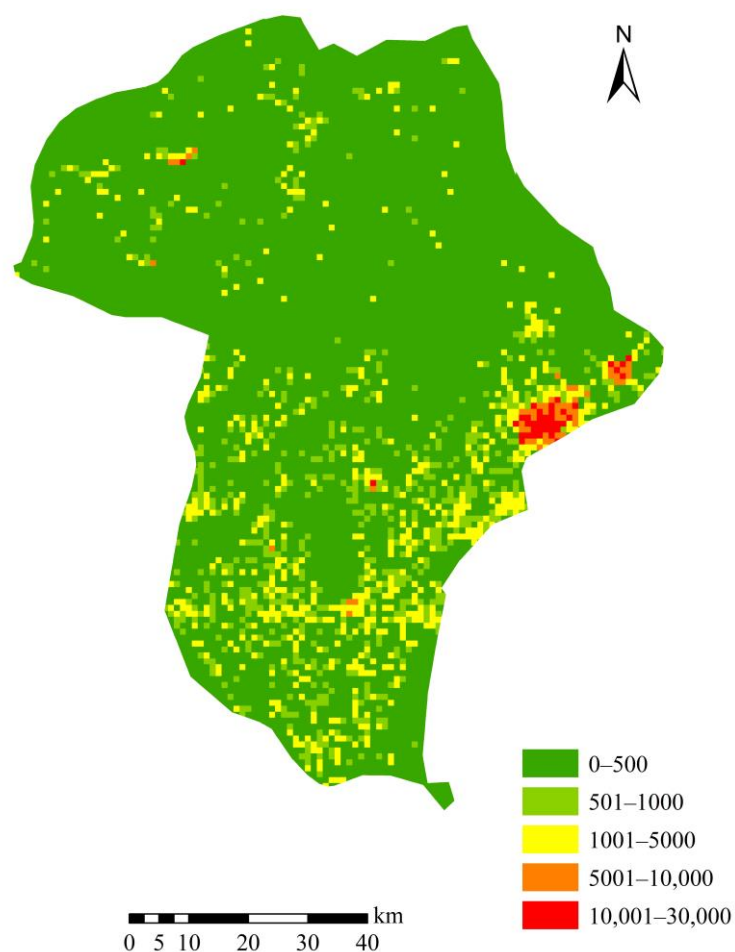

**Figure S1.** Distribution of population density in Qinhuangdao.

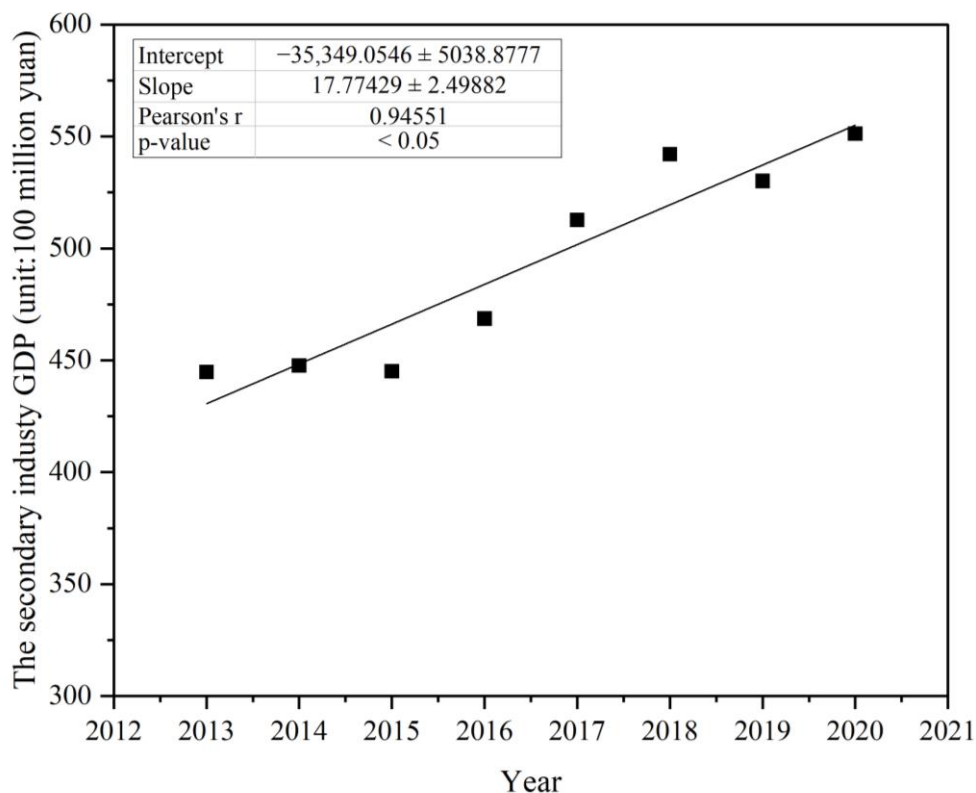

Figure S2. The prediction of the secondary industry GDP.

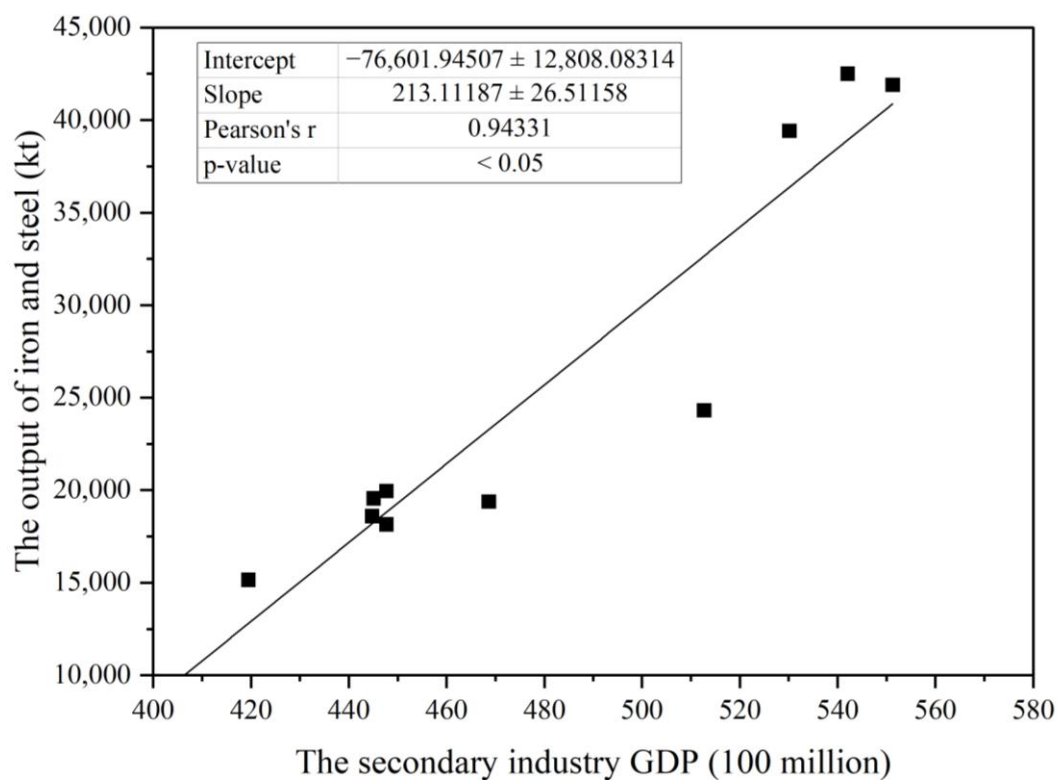

Figure S3. The relationship between the output of iron and steel and the secondary industry GDP.

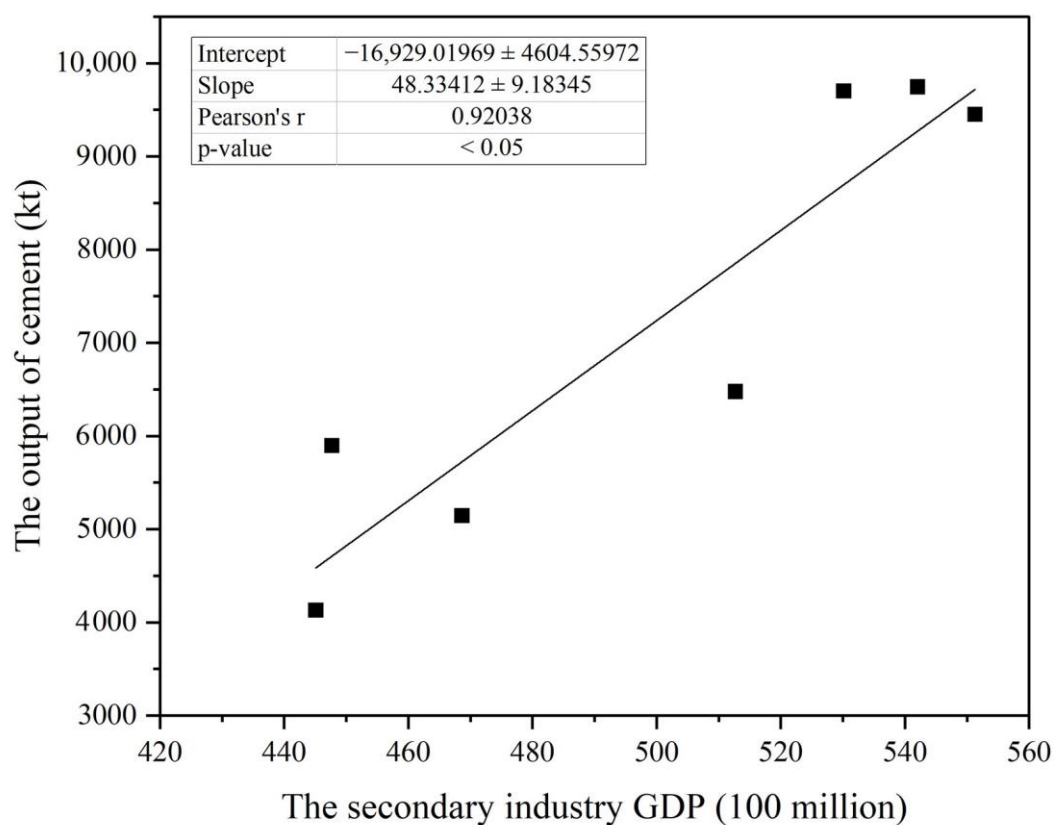

**Figure S4.** The relationship between the output of cement and the secondary industry GDP.

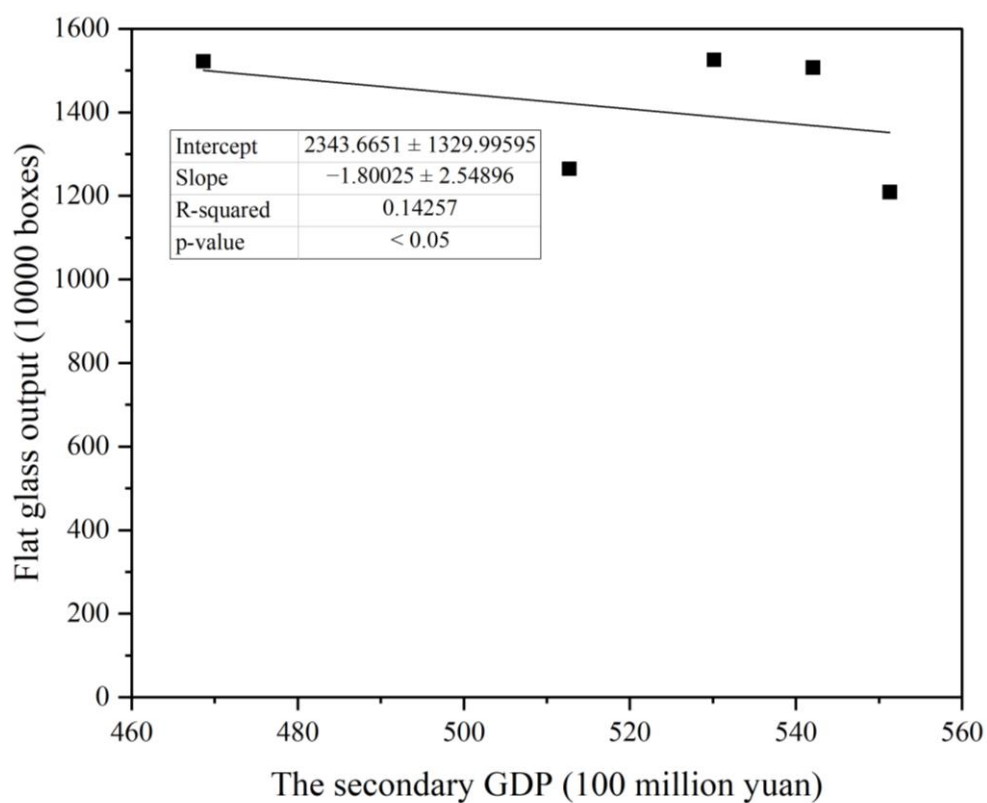

**Figure S5.** The relationship between the output of flat glass and the secondary industry GDP.

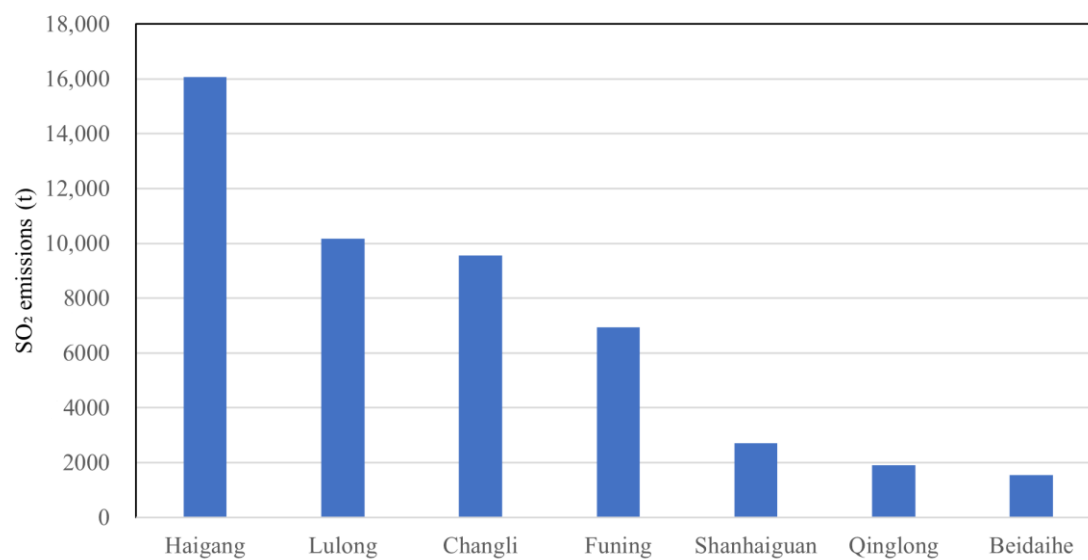

(a)

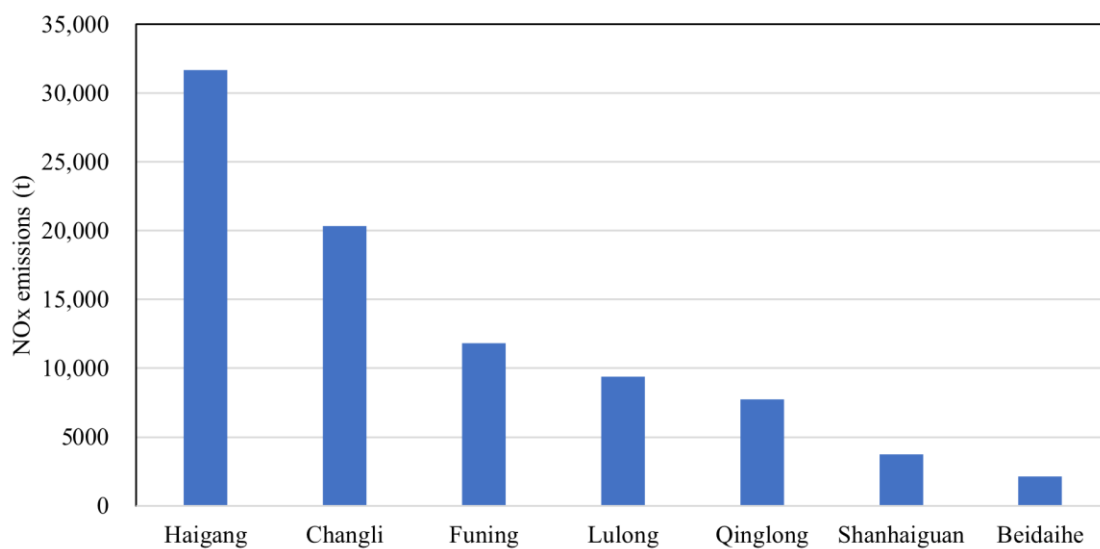

(b)

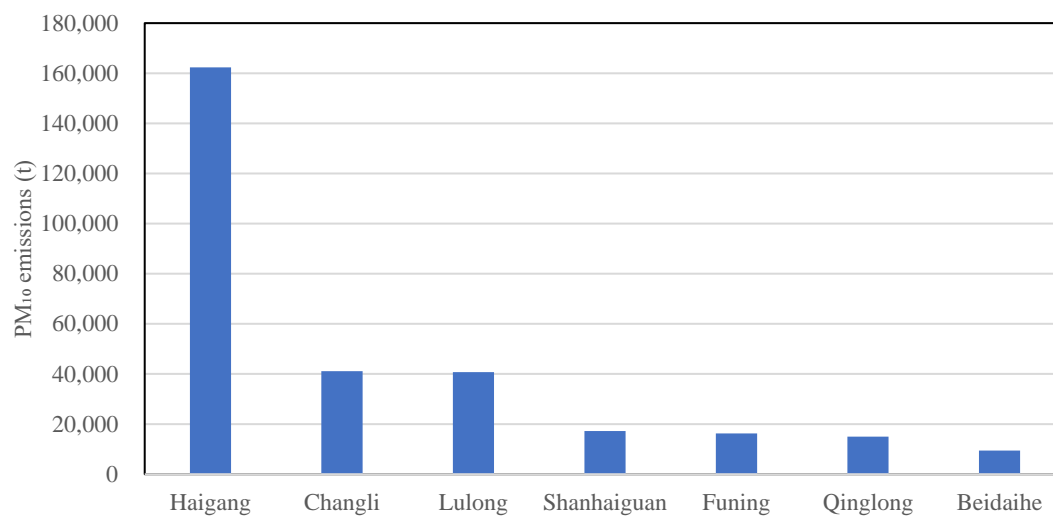

(c)

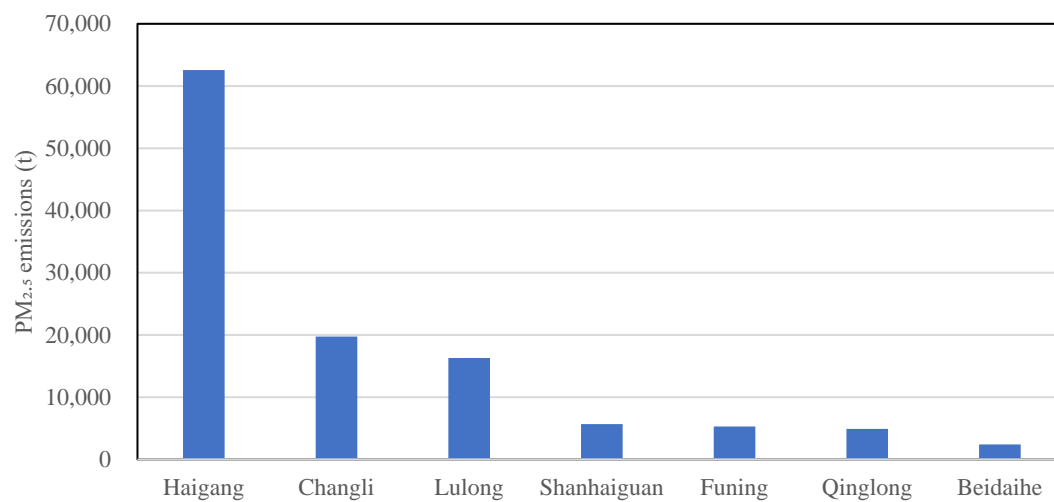

(d)

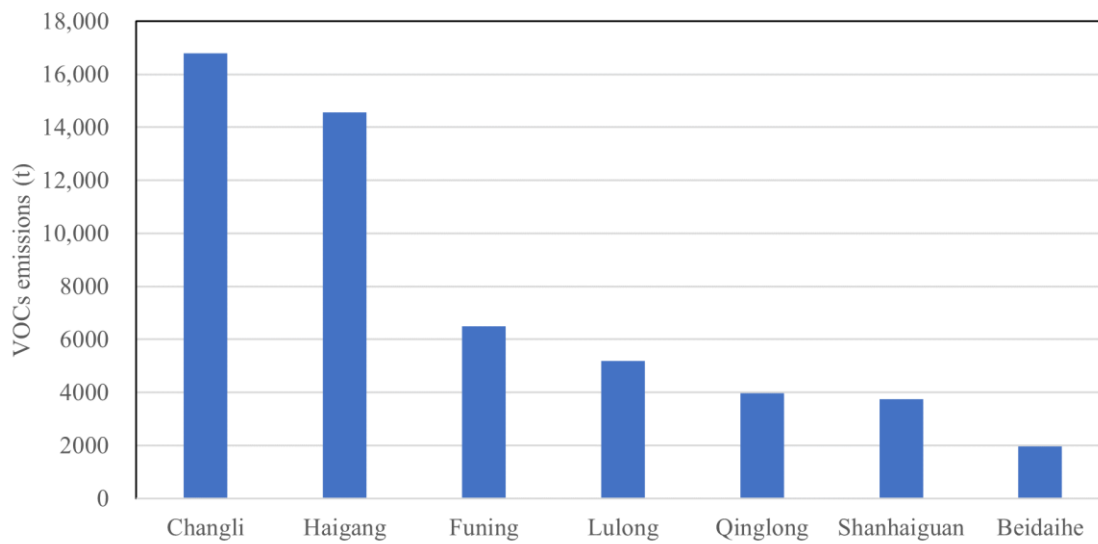

(e)



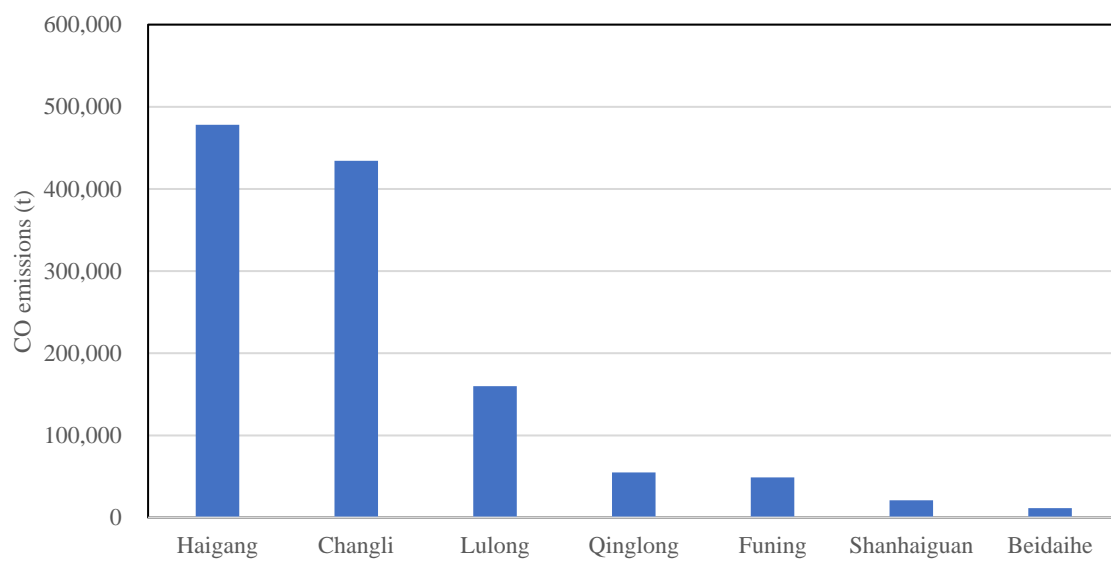

(f)

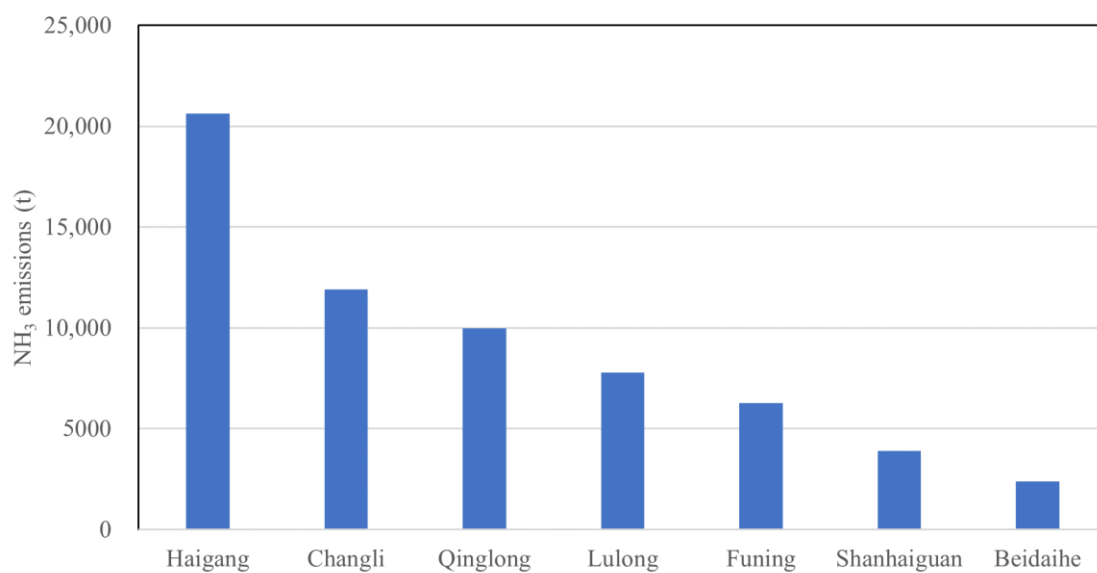

(g)

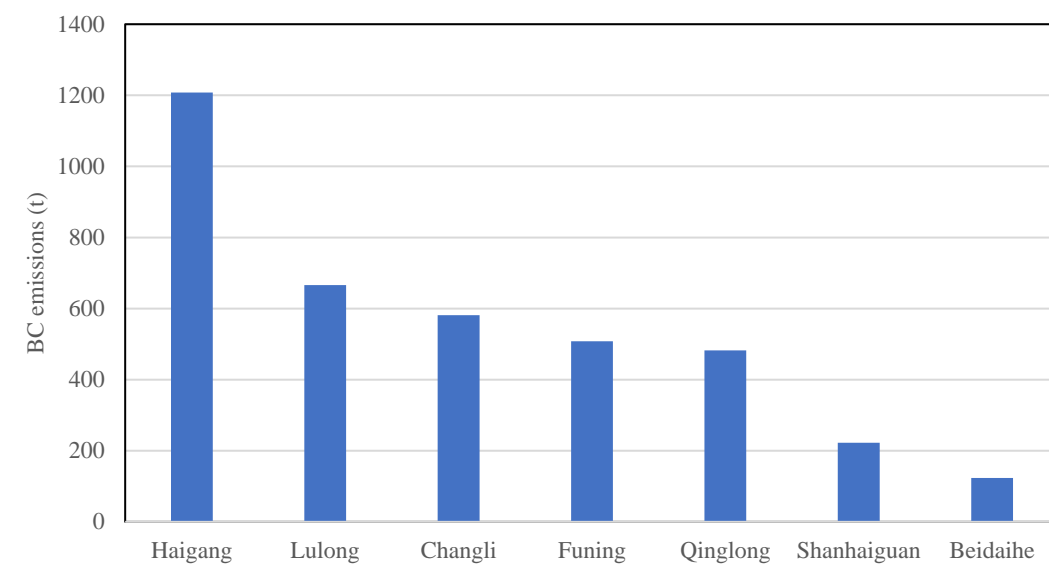

(h)

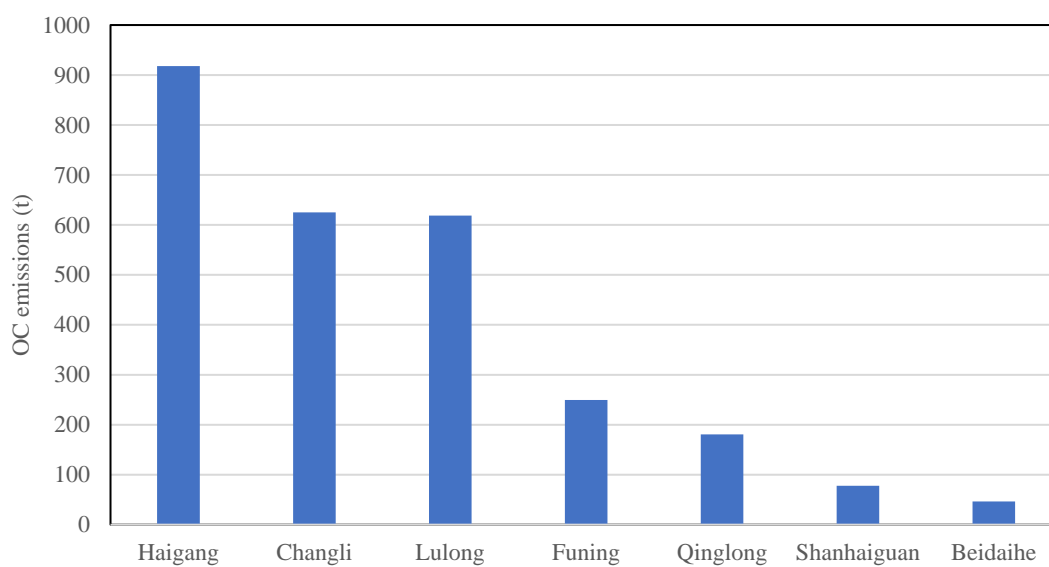

(i)

**Figure S6.** County-level contributions to the total emissions for nine pollutants (a–i) in Qinhuangdao.

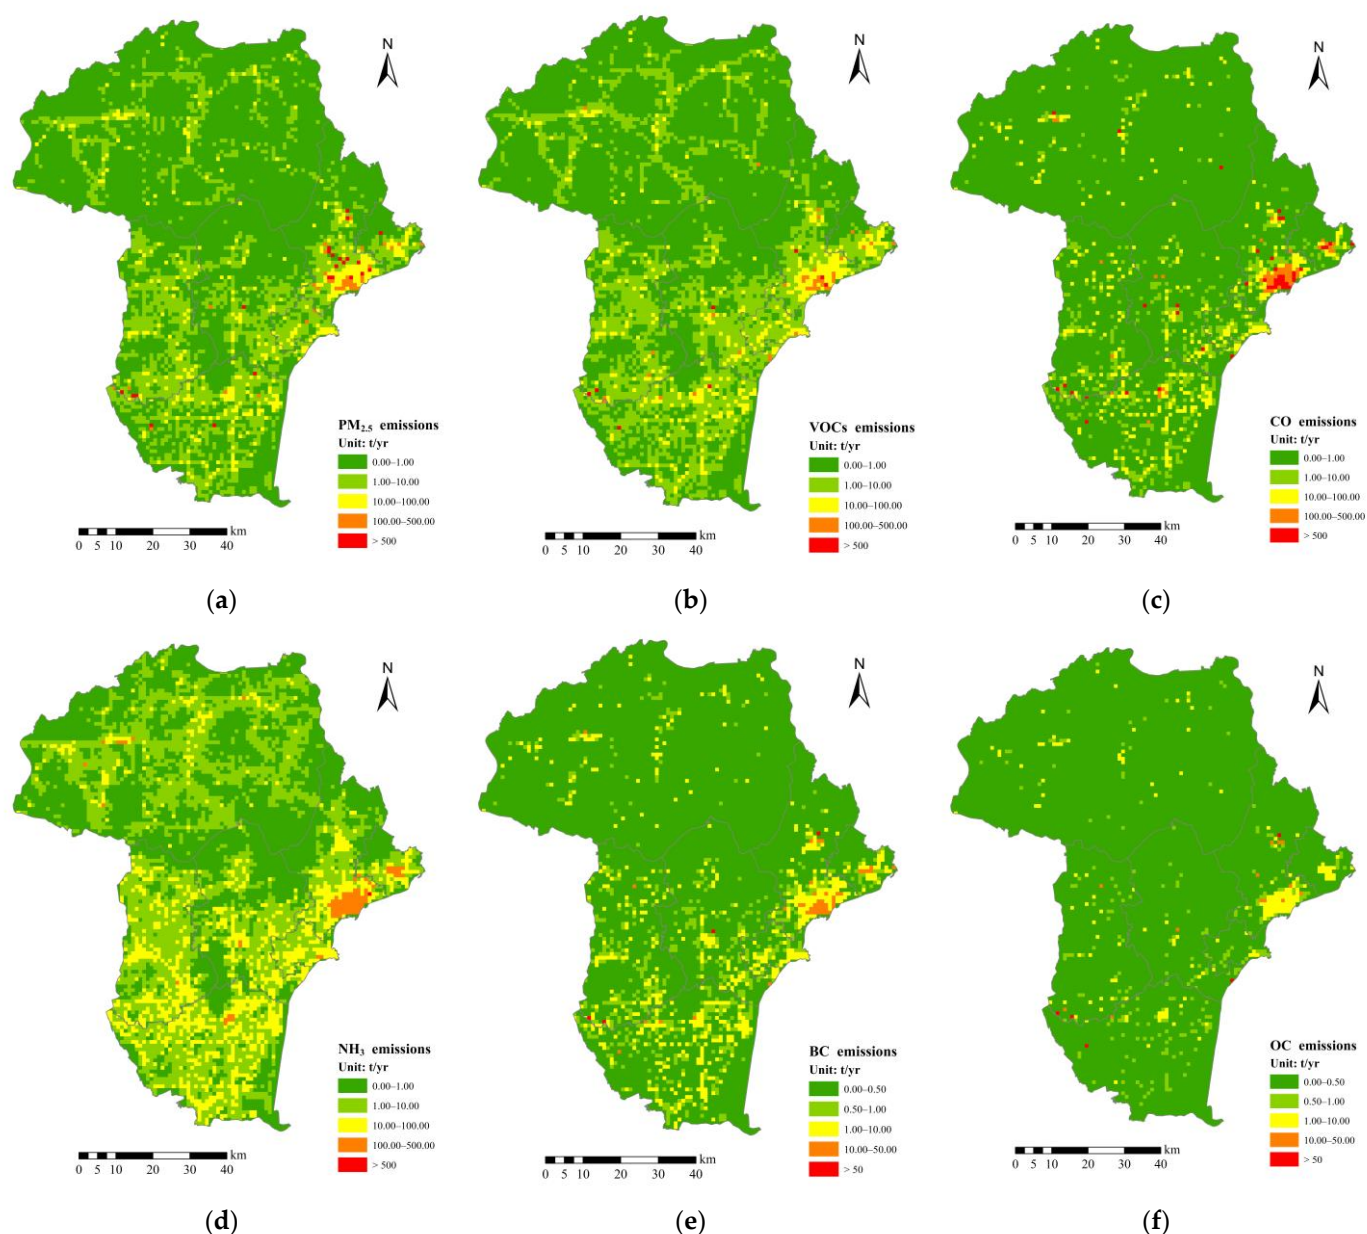

**Figure S7.** Spatial distribution characteristics of air pollutant emissions in Qinhuangdao for 2016. (a) PM<sub>2.5</sub>; (b) VOCs; (c) CO; (d) NH<sub>3</sub>; (e) BC; (f) OC.

## References

1. Ministry of Ecology and Environment of the People's Republic of China. Technical Guidelines for the Preparation of Air Pollutant Emission Inventory from Non-Road Mobile Sources (Trial). Available online: [https://www.mee.gov.cn/gkml/hbb/bgg/201501/t20150107\\_293955.htm](https://www.mee.gov.cn/gkml/hbb/bgg/201501/t20150107_293955.htm) (accessed on 31 December 2014). (In Chinese)
2. Ministry of Ecology and Environment of the People's Republic of China. Technical Guidelines for the Preparation of Dust Source Particulate Matter Emission Inventory (Trial). Available online: [https://www.mee.gov.cn/gkml/hbb/bgg/201501/t20150107\\_293955.htm](https://www.mee.gov.cn/gkml/hbb/bgg/201501/t20150107_293955.htm) (accessed on 31 December 2014). (In Chinese)
3. Ministry of Ecology and Environment of the People's Republic of China. Technical Guidelines for the Preparation of Atmospheric Ammonia Emission Inventory (Trial). Available online: [https://www.mee.gov.cn/gkml/hbb/bgg/201408/t20140828\\_288364.htm](https://www.mee.gov.cn/gkml/hbb/bgg/201408/t20140828_288364.htm) (accessed on 31 December 2014). (In Chinese)
4. Ministry of Ecology and Environment of the People's Republic of China. Technical Guide for Compiling Air Pollutant Emission Inventory of Civil Coal (Trial). Available online: [https://www.mee.gov.cn/gkml/hbb/bgg/201610/t20161031\\_366528.htm](https://www.mee.gov.cn/gkml/hbb/bgg/201610/t20161031_366528.htm) (accessed on 26 October 2016). (In Chinese)
5. He, K. *The Technical Guidelines for the Preparation of Emission Inventories*; School of Environment, Tsinghua University: Beijing, China, 2018.

6. Bo, X.; Xue, X.; Xu, J.; Du, X.; Zhou, B.; Tang, L. Aviation's emissions and contribution to the air quality in China. *Atmos. Environ.* **2019**, *201*, 121–131. <https://doi.org/10.1016/j.atmosenv.2019.01.005>.
7. DB13/2169-2018; Standards for Ultra-Low Emission of Air Pollutants in the Iron and Steel Industry. Department of Ecology and Environment of Hebei Province: Shijiazhuang, China, 2019.
8. Chen, X.; Li, J.; Jia, M.; Chen, S.; Zhang, S.; Bo, X.; Feng, X.; Dong, G. High Spatial Resolution Emission Inventory of Air Pollutants and Carbon in China's Independent Coking Industry. *Atmosphere* **2023**, *14*, 348. <https://doi.org/10.3390/atmos14020348>.
9. Bo, X. Emission Characteristics and Environmental Impacts of Air Pollutants in China's Iron and Steel Industry. Doctoral's Thesis, University of Science and Technology Beijing, Beijing, China, 2020.
10. Department of Ecology and Environment of Hebei Province. Interpretation of Three Local Standards: "Standards for Ultra-low Emission of Air Pollutants in the Cement Industry" and Others. Available online: <http://hbepb.hebei.gov.cn/hbhjt/zwgk/zc/101612404329562.html> (accessed on 13 March 2020). (In Chinese)
11. HJ847—2017; Technical Specification for Application and Issuance of Pollutant Permit Cement Industry. Ministry of Ecology and Environment of the People's Republic of China: Beijing, China, 2017.
12. HJ856—2017; Technical Specification for Application and Issuance of Pollutant Permit Glass Industry—Flat Glass. Ministry of Ecology and Environment of the People's Republic of China: Beijing, China, 2017.
13. Hua, H.; Jiang, S.; She, H.; Zhang, Y.; Liu, X.; Zhang, L.; Yuan, Z.; Chen, T. A high spatial-temporal resolution emission inventory of multi-type air pollutants for Wuxi city. *J. Clean. Prod.* **2019**, *229*, 278–288. <https://doi.org/10.1016/j.jclepro.2019.05.011>.
14. Xu, Z.J.; Chen, S.B.; Sang, M.J.; Wang, Z.T.; Bo, X.; You, Q. Air quality improvement through vehicle electrification in Hainan province, China. *Chemosphere* **2023**, *316*, 137814. <https://doi.org/10.1016/j.chemosphere.2023.137814>.
15. Zhao, Y.; Zhou, Y.; Qiu, L.; Zhang, J. Quantifying the uncertainties of China's emission inventory for industrial sources: From national to provincial and city scales. *Atmos. Environ.* **2017**, *165*, 207–221. <https://doi.org/10.1016/j.atmosenv.2017.06.045>.
